# Supplementary material for: High pairing rate Janus-structured microfibers and array: high-efficiency conjugate electrospinning fabrication, structure analysis and co-instantaneous multifunctionality of anisotropic conduction, magnetism and enhanced red fluorescence
Source: Royal Society of Chemistry journal article supplement (doi:10.1039/c9ra01147a), 2019-01-01
Supplement: c9ra01147a1.pdf [file c9ra01147a1.pdf]

## Electronic Supplementary Information (ESI)

# High-pairing Rate Janus-structured Microfibers and Array: High-efficiency Conjugate Electrospinning Fabrication, Structure and Coinstantaneous Multifunctionality of Anisotropic Conduction, Magnetism and Enhanced Red Fluorescence

Jiao Tian, Qianli Ma, Wensheng Yu, Dan Li, Xiangting Dong\*, Guixia Liu, Jinxian Wang  
Key Laboratory of Applied Chemistry and Nanotechnology at Universities of Jilin Province,  
Changchun University of Science and Technology, Changchun 130022. Fax:  
86043185383815; Tel: 86043185582574; E-mail: dongxiangting888@163.com

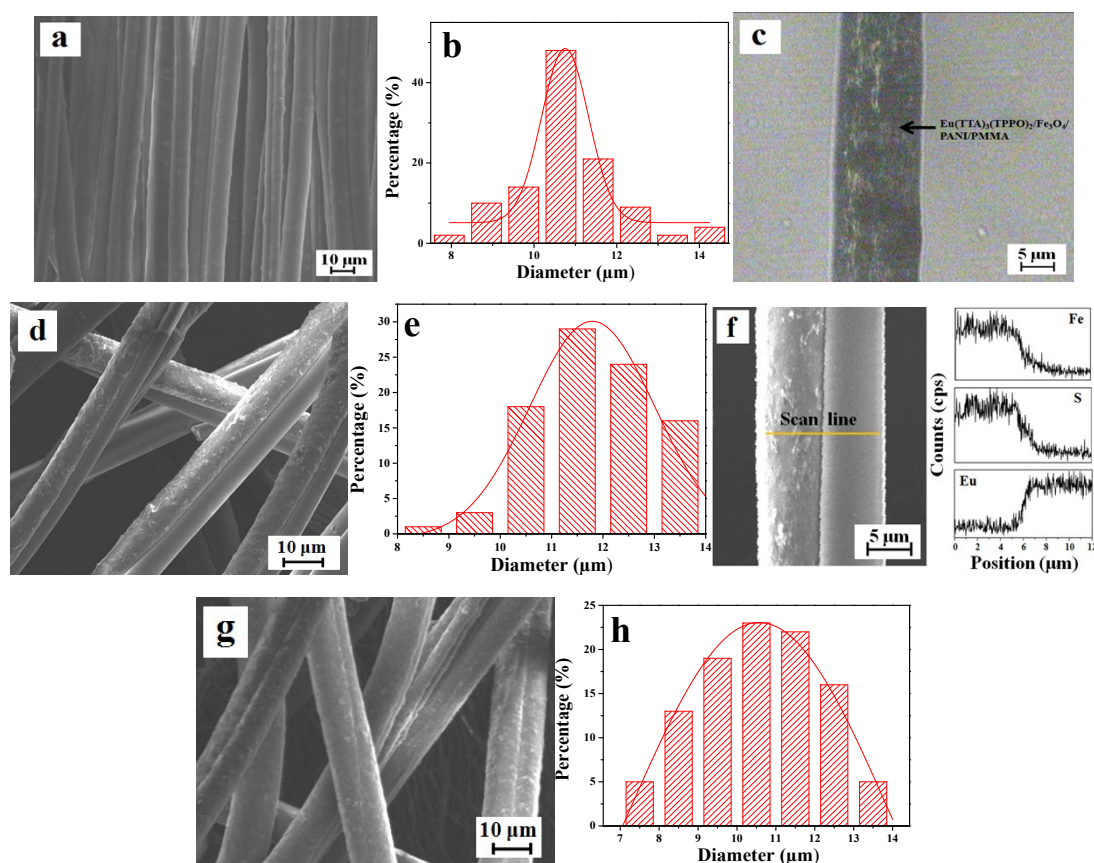

**Figure S1** SEM images of composite microfibers array (S11, a), Janus-structured microfibers non-array (S12, d) and composite microfibers non-array (S13, g); histograms of diameter of composite microfibers in array (S11, b), Janus-structured microfibers in non-array (S12, e) and composite microfibers in non-array (S13, h); OM of single composite microfiber (S11, c); EDS line scan analysis of single Janus-structured microfiber in non-array (S12, f)

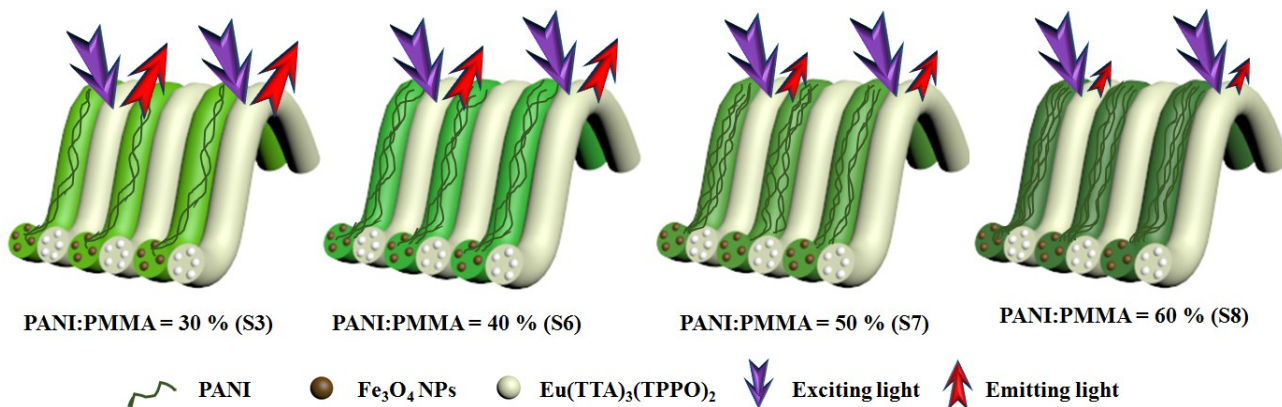

**Figure S2** Schematic diagram of the situation of the exciting light and emitting light in Janus-structured microfibers arrays with disparate percentages of PANI

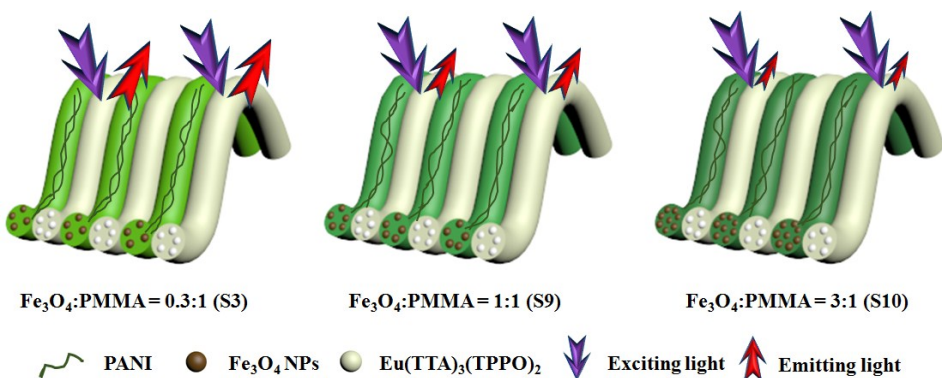

**Figure S3** Schematic diagram of the situation of the exciting light and emitting light in Janus-structured microfibers arrays with disparate mass fractions of  $\text{Fe}_3\text{O}_4$  NPs

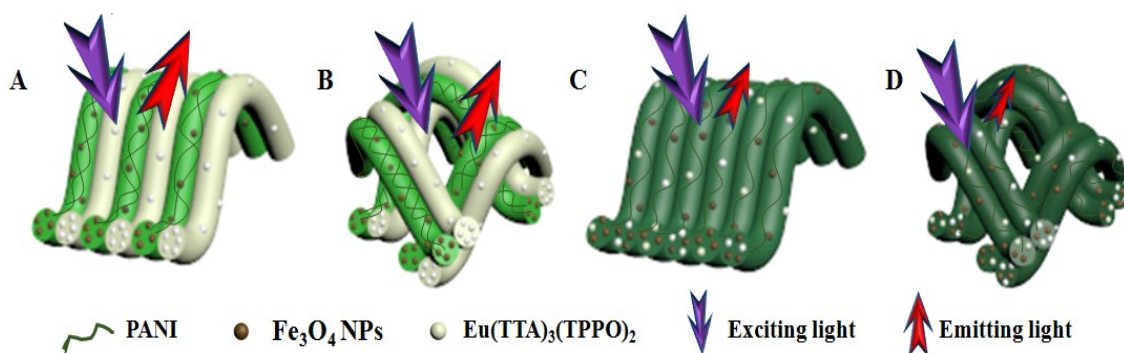

**Figure S4** Schematic illustration of the exciting light and emitting light in Janus-structured microfibers array (A) and non-array (B), composite microfibers array (C) and non-array (D)

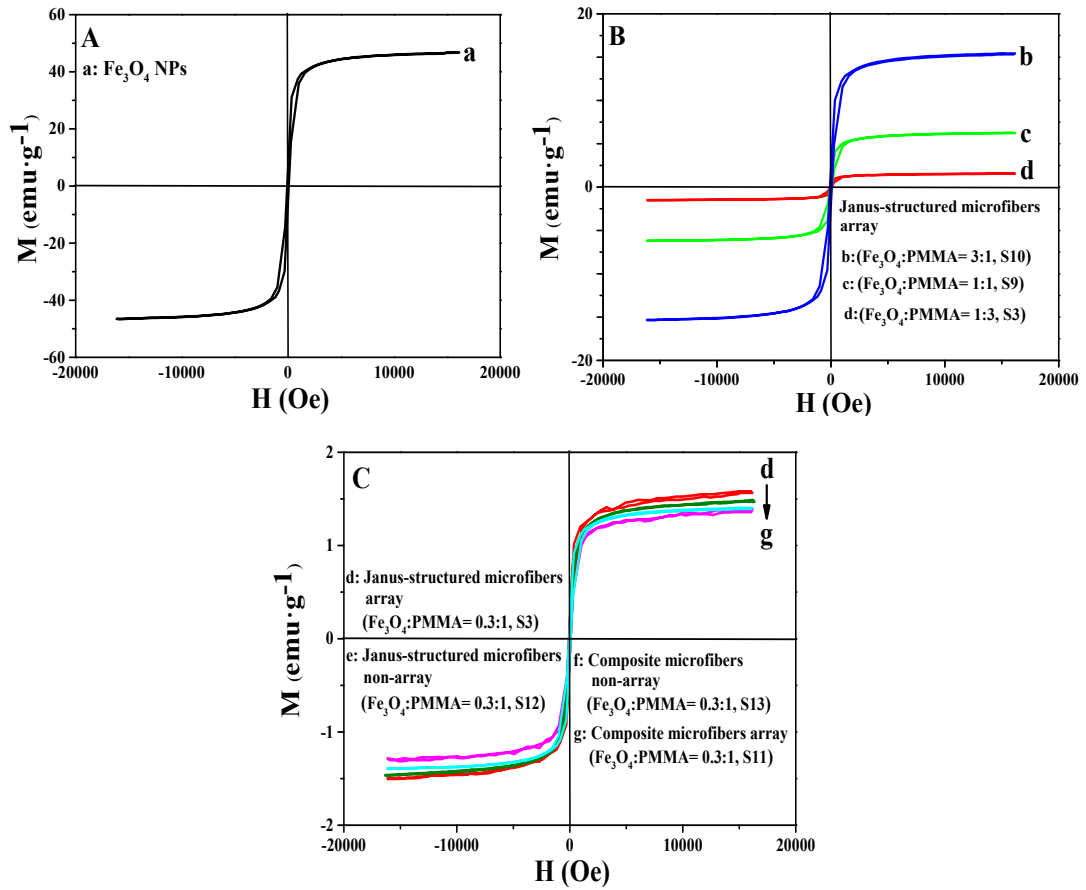

**Figure S4** Hysteresis loops of  $\text{Fe}_3\text{O}_4$  NPs (A), Janus-structured microfibers arrays with various mass ratios of  $\text{Fe}_3\text{O}_4$  to PMMA (B) and contradistinctive specimens (C)
